# Supplementary material for: H3K9 Promotes Under-Replication of Pericentromeric Heterochromatin in Drosophila Salivary Gland Polytene Chromosomes
Source: PubMed Central journal article supplement (PMC6409945; doi:10.3390/genes10020093), 2019-01-29
Supplement: genes-10-00093-s001.pdf [file genes-10-00093-s001.pdf]

## Supplementary Materials

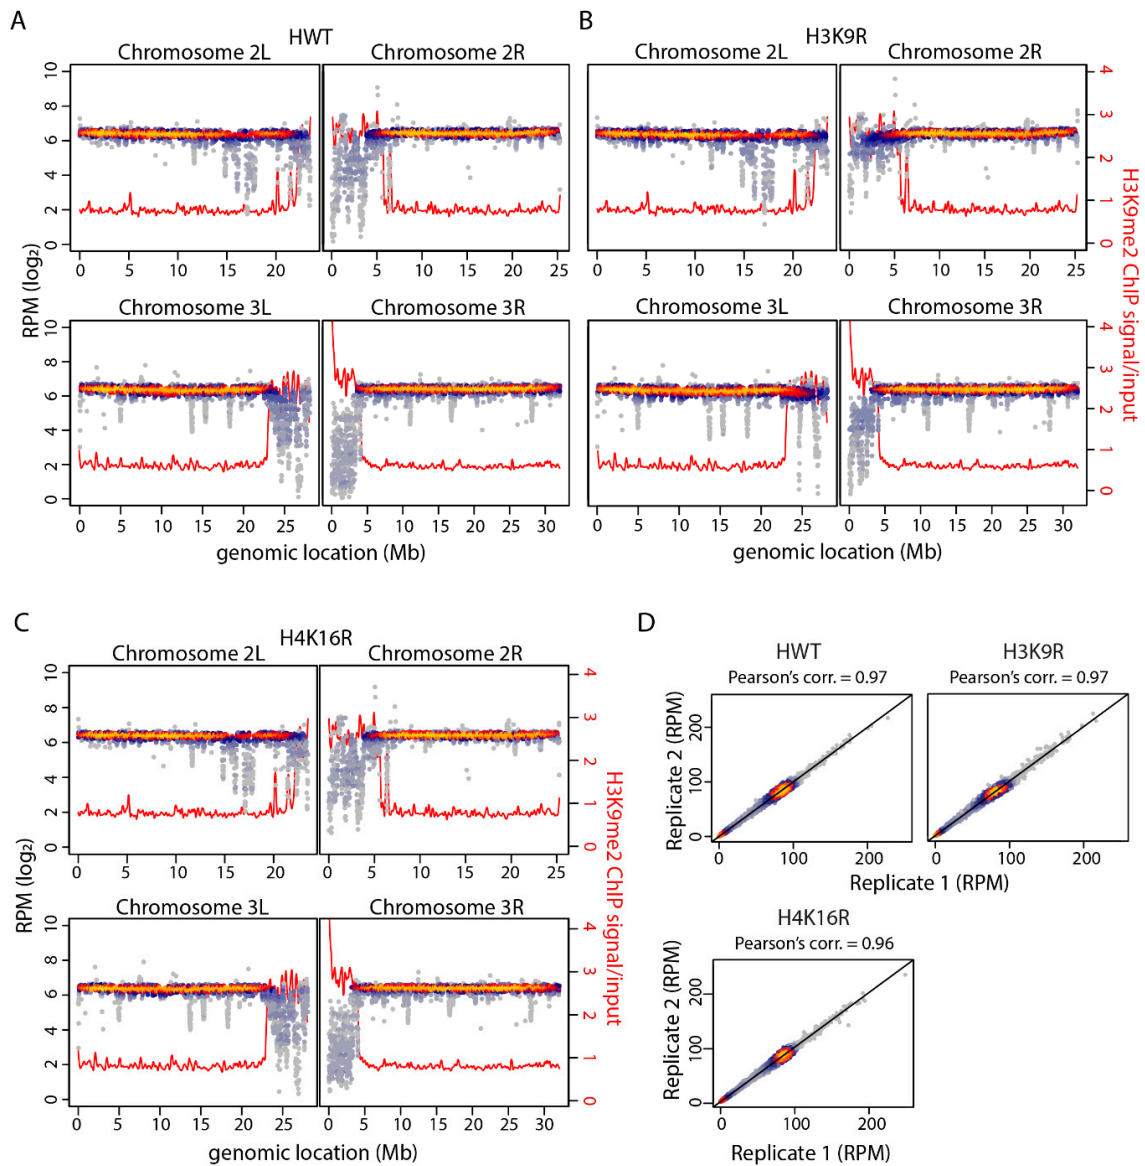

**Figure S1.** DNA copy number in pericentric heterochromatin is elevated in *H3K9R* mutants. **A–C**) Heatscatter plot of **A**) *HWT* normalized copy number ( $\log_2$ ), **B**) *H3K9R* normalized copy number ( $\log_2$ ) and **C**) *H4K16R* normalized copy number ( $\log_2$ ) at 10kb windows along Chromosomes 2 and 3. LOESS regression line of modENCODE H3K9me2 ChIP signal is shown in red (GSE47260). **D**) Heatscatter plot comparing normalized signal at 10kb windows of two replicates each for *HWT*, *H3K9R* and *H4K16R* genotypes along all major chromosome scaffolds (Chromosomes 2L, 2R, 3L, 3R, 4 and X). Pearson's correlation value is indicated.
